# Supplementary material for: The Functions of β-Defensin in Flounder (Paralichthys olivaceus): Antibiosis, Chemotaxis and Modulation of Phagocytosis
Source: MDPI journal article supplement (doi:10.3390/biology10121247), 2021-11-29
Supplement: s1 [file s1]

**Table S1.** The different concentrations of rfBD on antibacterial activity of *S. aureus*, *M. luteus*, *E. coli*, *V. al-ginolyticus* and *V. anguillarum*. Data represent mean  $\pm$  S.D. (n = 3).

| Concentration<br>( $\mu\text{g}\cdot\text{ml}^{-1}$ ) | OD value at 600 nm     |                        |                        |                        |                        |
|-------------------------------------------------------|------------------------|------------------------|------------------------|------------------------|------------------------|
|                                                       | <i>S.aureus</i>        | <i>M.luteus</i>        | <i>E.coli</i>          | <i>V.alginolyticus</i> | <i>V.anguillarum</i>   |
| 64.87                                                 | 0.0556<br>$\pm 0.009$  | 0.0537<br>$\pm 0.0006$ | 0.0635<br>$\pm 0.0107$ | 0.0563<br>$\pm 0.0111$ | 0.0614<br>$\pm 0.0113$ |
| 32.44                                                 | 0.0539<br>$\pm 0.012$  | 0.069<br>$\pm 0.0057$  | 0.0547<br>$\pm 0.0073$ | 0.0596<br>$\pm 0.0107$ | 0.0666<br>$\pm 0.0161$ |
| 16.22                                                 | 0.0808<br>$\pm 0.024$  | 0.0675<br>$\pm 0.0164$ | 0.0676<br>$\pm 0.001$  | 0.0584<br>$\pm 0.015$  | 0.0555<br>$\pm 0.0083$ |
| 8.11                                                  | 1.0653<br>$\pm 0.0814$ | 0.1135<br>$\pm 0.0271$ | 0.0952<br>$\pm 0.007$  | 0.0738<br>$\pm 0.0204$ | 0.0771<br>$\pm 0.0074$ |
| 4.06                                                  | 1.2897<br>$\pm 0.0774$ | 1.2165<br>$\pm 0.0546$ | 0.8934<br>$\pm 0.094$  | 0.1359<br>$\pm 0.0452$ | 0.0981<br>$\pm 0.0178$ |
| 2.03                                                  | 1.4225<br>$\pm 0.1323$ | 1.3207<br>$\pm 0.0654$ | 0.9355<br>$\pm 0.034$  | 1.0575<br>$\pm 0.0867$ | 0.8667<br>$\pm 0.0891$ |
| 1.02                                                  | 1.3913<br>$\pm 0.0792$ | 1.4905<br>$\pm 0.0887$ | 0.8681<br>$\pm 0.1001$ | 1.3206<br>$\pm 0.0734$ | 0.8854<br>$\pm 0.0537$ |
| 0.51                                                  | 1.478<br>$\pm 0.0586$  | 1.4453<br>$\pm 0.0615$ | 1.0766<br>$\pm 0.1087$ | 1.3468<br>$\pm 0.0685$ | 0.9114<br>$\pm 0.0603$ |
| 0.26                                                  | 1.531<br>$\pm 0.0474$  | 1.4754<br>$\pm 0.0223$ | 1.0805<br>$\pm 0.1158$ | 1.4266<br>$\pm 0.0657$ | 0.9155<br>$\pm 0.1629$ |
| 0.13                                                  | 1.486<br>$\pm 0.0548$  | 1.5108<br>$\pm 0.0507$ | 1.1389<br>$\pm 0.0939$ | 1.4966<br>$\pm 0.0345$ | 0.9854<br>$\pm 0.1395$ |
| 0.00                                                  | 1.5243<br>$\pm 0.0499$ | 1.5054<br>$\pm 0.0368$ | 1.2022<br>$\pm 0.0256$ | 1.485<br>$\pm 0.0605$  | 1.0657<br>$\pm 0.0746$ |

| OD value at 600 nm |                     |
|--------------------|---------------------|
| MH medium          | 0.0557 $\pm$ 0.0085 |
