# Supplementary material for: The Functions of β-Defensin in Flounder (Paralichthys olivaceus): Antibiosis, Chemotaxis and Modulation of Phagocytosis
Source: MDPI journal article supplement (doi:10.3390/biology10121247), 2021-11-29

1. The agarose gel electrophoresis of fBD gene amplified from head kidney by PCR (the full picture of Fig. 2A).

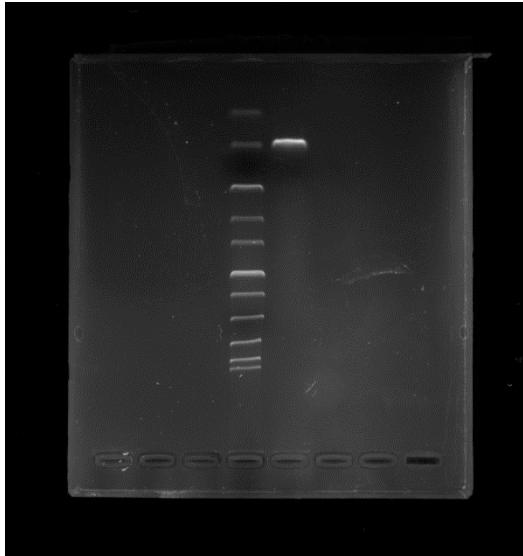

2. SDS-PAGE analysis of rfBD peptide (the full picture of Fig. 2B).

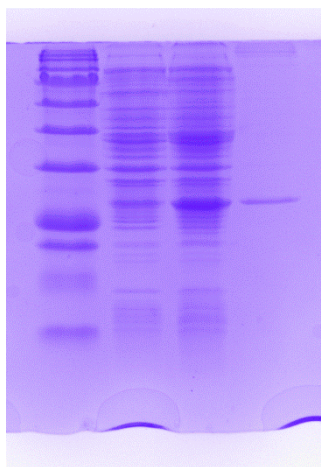

3. SDS-PAGE analysis of rfBD peptide after digestion (the full picture of Fig. 2C).

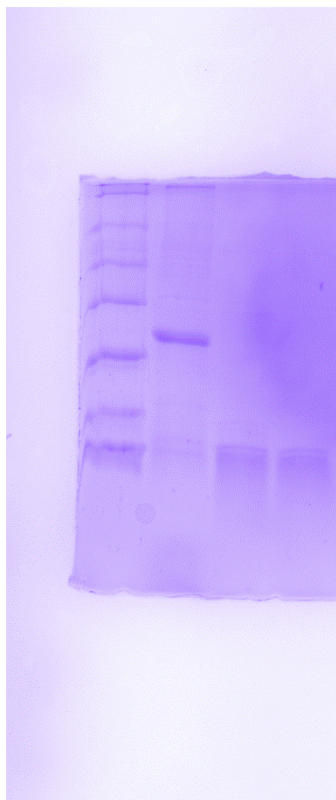

Supplement: s1 [file s1]
